# Supplementary material
Source: publisher figshare collection journal article supplement (https://acs.figshare.com/ndownloader/files/4013317)
Supplement: Supplementary file 1 [file 4013317]

## Supporting Information

### Folding Construction of Doubly-fused Tricyclic, $\beta$ - and $\gamma$ -Graph Polymer Topologies with *kyklo*-Telechelic Precursors Obtained through An Orthogonal Click/ESA-CF Protocol

Masahito Igari, Hiroyuki Heguri, Takuya Yamamoto, and Yasuyuki Tezuka\*

Department of Organic and Polymeric Materials, Tokyo Institute of Technology, O-okayama,

Meguro-ku, Tokyo 152-8552, Japan

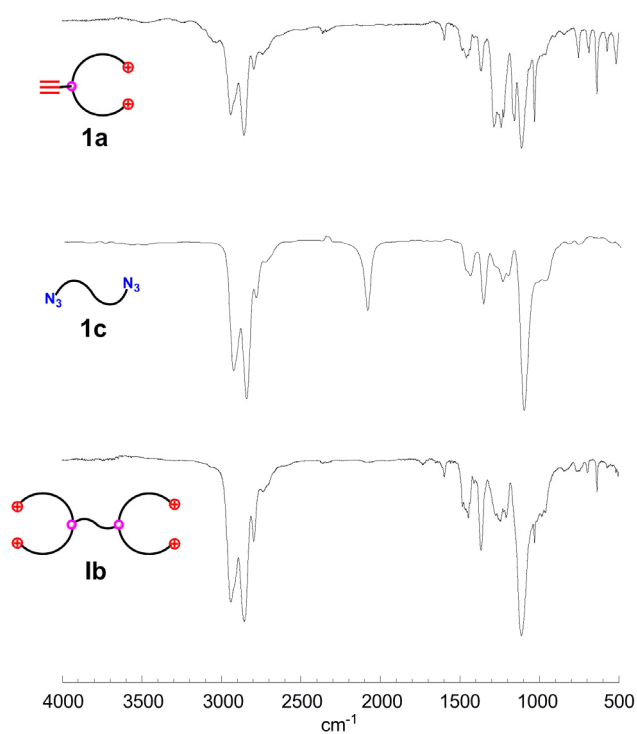

**Figure S1.** IR spectra of (top) **1a**/CF<sub>3</sub>SO<sub>3</sub><sup>-</sup>, (middle) **1c**, and (bottom) **1b**/CF<sub>3</sub>SO<sub>3</sub><sup>-</sup>.

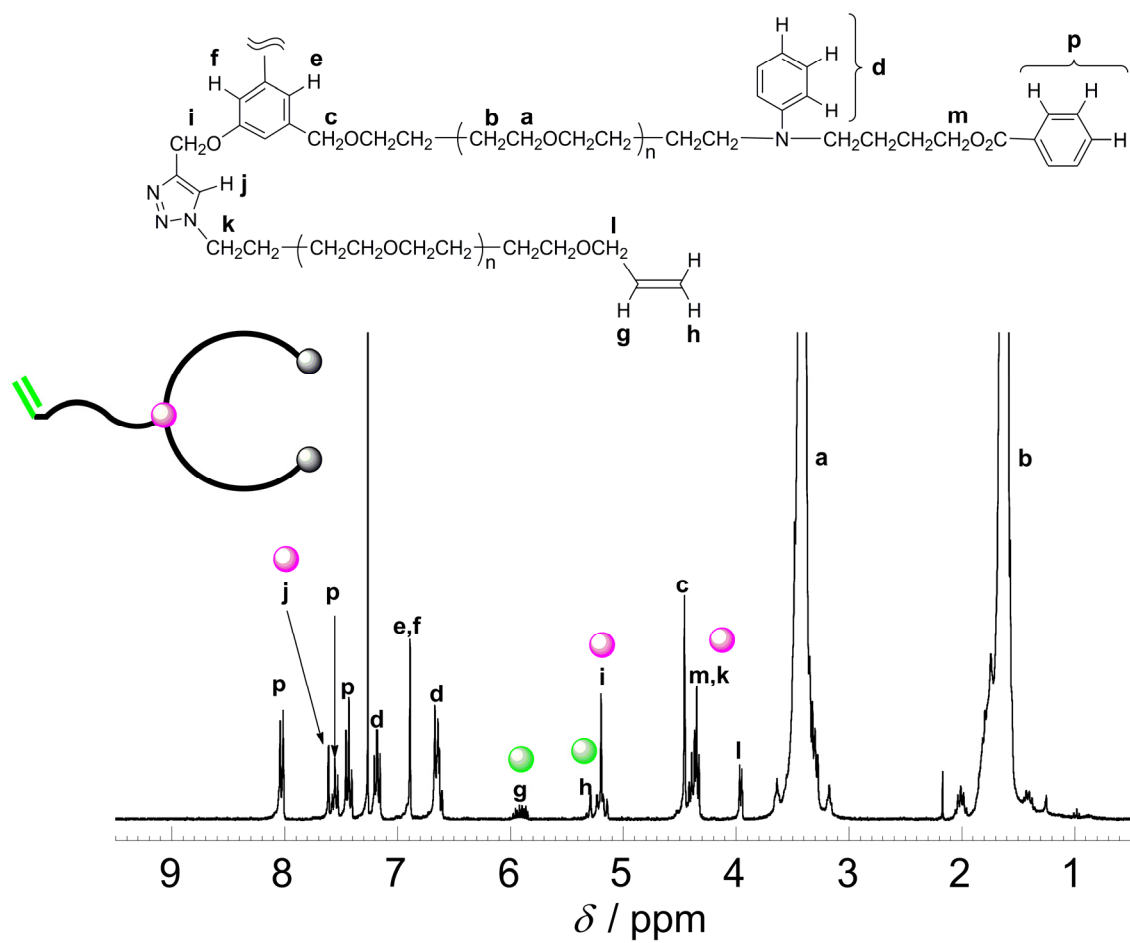

**Figure S2.** 300 MHz <sup>1</sup>H NMR spectra of **1a**, measured after the covalent conversion of *N*-phenylpyrrolidinium salt end groups by the ring-opening reaction with a benzoate anion. (CDCl<sub>3</sub>, 40 °C)

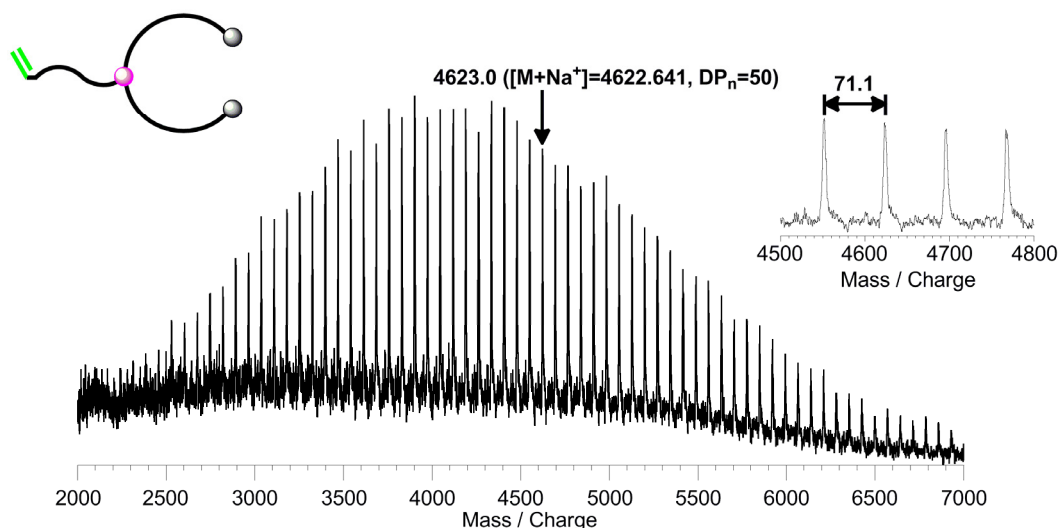

**Figure S3.** MALDI-TOF mass spectra of **Ia**, measured after the covalent conversion of *N*-phenylpyrrolidinium salt end groups by the ring-opening reaction with a benzoate anion. (Linear mode, matrix: dithranol with sodium trifluoroacetate.  $DP_n$  denotes the number of monomer units in the product.)

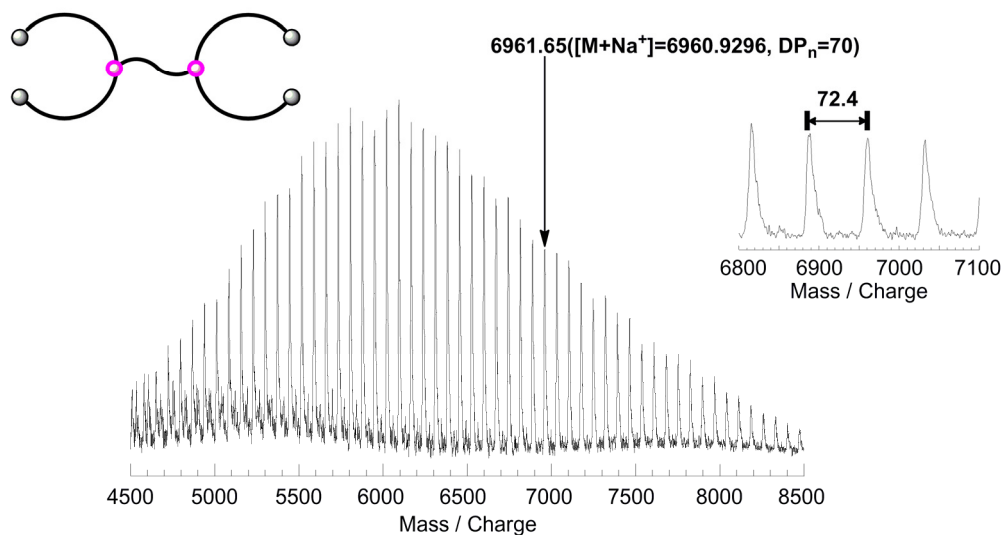

**Figure S4.** MALDI-TOF mass spectra of **Ib**, measured after the covalent conversion of *N*-phenylpyrrolidinium salt end groups by the ring-opening reaction with a benzoate anion. (Linear mode, matrix: dithranol with sodium trifluoroacetate.  $DP_n$  denotes the number of monomer units in the product.)

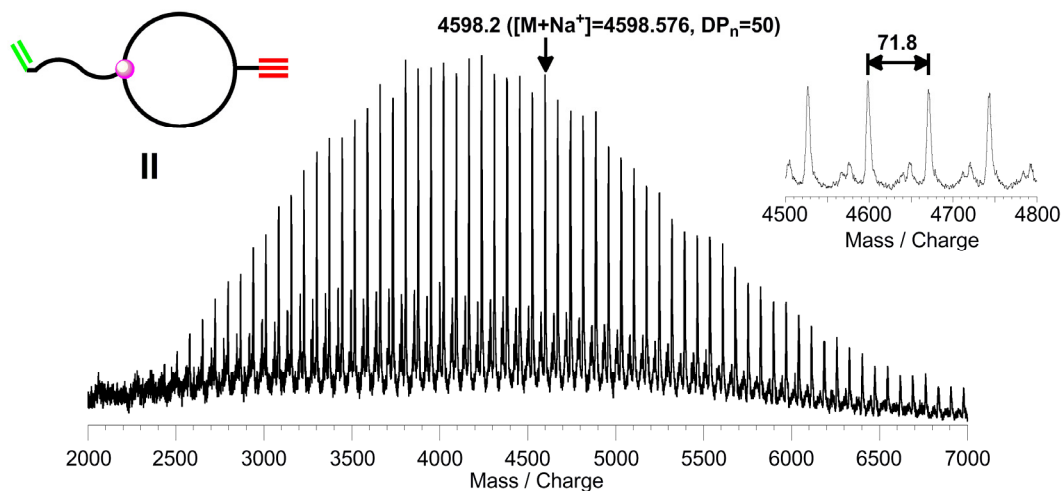

**Figure S5.** MALDI-TOF mass spectra of **II**. (Linear mode, matrix: dithranol with sodium trifluoroacetate.  $DP_n$  denotes the number of monomer units in the product.)

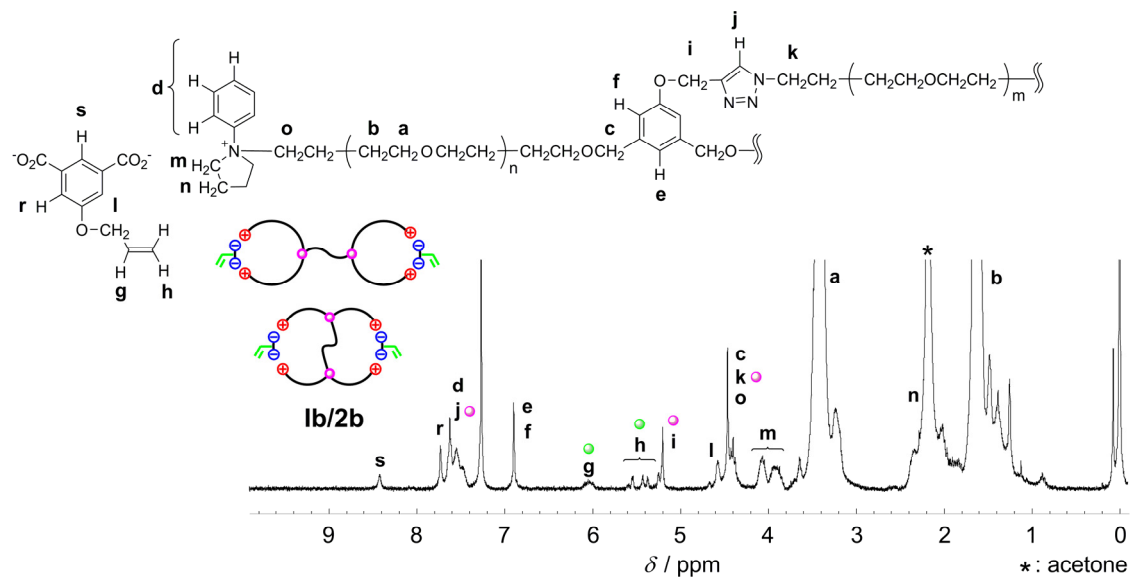

**Figure S6.** 300 MHz  $^1H$  NMR spectra of **Ib/2b**. ( $CDCl_3$ , 40  $^{\circ}C$ )
